# Supplementary material
Source: Elsevier journal article supplement (https://www.sciencedirect.com/science/article/pii/S2173572721001077)
Supplement: mmc1 [file S2173572721001077:mmc1.docx]

**Tabla S1. Resultados descriptivos factores del entorno y diferencias en los tres tiempos analizados (prueba de rangos de Wilcoxon)**

| **Ítems del cuestionario** | 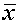 | **DS** | **Evaluación alta [Z (p)]** |
| --- | --- | --- | --- |
| Ruido (1º día) | 2,74 | 2,773 | NS |
| Ruido (Media estancia) | 2,61 | 2,711 | NS |
| Ruido (Alta) | 2,60 | 2,819 | NS |
| Luz (1º día) | 2,45 | 2,574 | NS |
| Luz (Media estancia) | 2,23 | 2,461 | NS |
| Luz (Alta) | 1,96 | 2,244 | NS |
| Cuidados de enfermería (1º día) | 1,84 | 1,895 | (Z=-2.73, p=.005**) |
| Cuidados de enfermería (Media estancia) | 1,67 | 1,543 | NS |
| Cuidados de enfermería (Alta) | 1,60 | 1,800 | NS |
| Test diagnósticos (1º día) | 1,56 | 1,677 | NS |
| Test diagnósticos (Media estancia) | 1,38 | 1,245 | NS |
| Test diagnósticos (Alta) | 1,32 | 1,299 | NS |
| Actividades de enfermería (1º día) | 1,87 | 2,040 | (Z=-2.33, p= .019*) |
| Actividades de enfermería (Media estancia) | 1,89 | 1,893 | (Z=-3.02, p= .003**) |
| Actividades de enfermería (Alta) | 1,48 | 1,567 | NS |
| Extracción muestras sanguíneas (1º día) | 1,72 | 1,920 | (Z=-2.37, p= .018*) |
| Extracción muestras sanguíneas (Media estancia) | 1,64 | 1,610 | (Z=-2.53 , p= 0,011*) |
| Extracción muestras sanguíneas (Alta) | 1,33 | 1,399 | NS |
| Administración medicamentos (1º día) | 1,79 | 1,935 | (Z=-2.39, p= .017*), |
| Administración medicamentos (Media estancia) | 1,70 | 1,805 | NS |
| Administración medicamentos (Alta) | 1,44 | 1,551 | NS |
| Total (1º día) | 14,00 | 11,332 | (Z=-3.04, p= .002**) |
| Total (Media estancia) | 12,90 | 9,227 | (Z=-2.43, p= .019*) |
| Total (Alta) | 11,86 | 9,039 | NS |

Valor de la media (
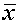
). Desviación estándar (DS). Prueba de los rangos de Wilcoxon (Z). P valor ≤ 0,05*, P valor ≤ 0,005**.

**Tabla S2. Resultados descriptivos ruidos y diferencias en los tres tiempos analizados** (prueba de rangos de Wilcoxon)

| **Ítem del cuestionario** | 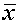 | **DS** | **Evaluación media estancia [Z (p)]** | **Evaluación alta [Z (p)]** |
| --- | --- | --- | --- | --- |
| Alarmas (1ª día) | 3,04 | 3,083 | NS | (Z=-2,35 p=0,019) |
| Alarmas (Media estancia) | 2,31 | 2,477 | NS | NS |
| Alarmas (Alta) | 2,44 | 2,589 | NS | NS |
| Pulsioxímetro (1ª día) | 1,84 | 2,296 | NS | (Z=-2,42 p=0,41) |
| Pulsioxímetro (Media estancia) | 1,62 | 1,755 | NS | NS |
| Pulsioxímetro (Alta) | 1,45 | 1,526 | NS | NS |
| Escuchar gente hablar (1ª día) | 2,65 | 2,855 | (Z=-3,093 p=0,002) | NS |
| Escuchar gente hablar (Media estancia) | 2,02 | 2,088 | NS | NS |
| Escuchar gente hablar (Alta) | 2,33 | 2,535 | NS | NS |
| Aspiración de secreciones (1ª día) | 1,53 | 1,794 | NS | (Z=-2,52 p=0,010) |
| Aspiración de secreciones (Media estancia) | 1,32 | 1,381 | NS | NS |
| Aspiración de secreciones (Alta) | 1,16 | ,882 | NS | NS |
| Nebulizaciones-Administración oxígeno (1ª día) | 2,30 | 2,760 | NS | (Z=-3,021 p=0,003) |
| Nebulizaciones-Administración oxígeno (Media estancia) | 2,06 | 2,426 | NS | (Z=-2,53 p=0,011) |
| Nebulizaciones-Administración oxígeno (Alta) | 1,56 | 1,695 | NS | NS |
| Teléfono (1ª día) | 1,49 | 1,673 | NS | NS |
| Teléfono (Media estancia) | 1,28 | 1,097 | NS | NS |
| Teléfono (Alta) | 1,26 | 1,183 | NS | NS |
| Total (1ª día) | 13,04 | 9,255 | (Z=-3,39 p=0,001***) | (Z=-3,38 p=0,001***) |
| Total (Media estancia) | 10,67 | 7,076 | NS | NS |
| Total (Alta) | 10,36 | 6,178 | NS | NS |

Valor de la media (
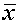
). Desviación estándar (DS). Prueba de los rangos de Wilcoxon (Z). P valor ≤ 0,05*, P valor ≤ 0,005**, P valor ≤ 0,001***.

**Tabla S3. Correlación entre Calidad del Sueño con los factores ambientales y los factores que ocasionan ruido.**

| **Factores ambientales** | **Calidad del sueño en UCI [*r* (*p*)]** | | | **Ruido** | **Calidad del sueño en UCI [*r* (*p*)]** | | |
| --- | --- | --- | --- | --- | --- | --- | --- |
| (1º día) | (Media estancia) | (Alta) | (1º día) | (Media estancia) | (Alta) |
| Ruido | -0,148 (0,094) | -0,200 (0,019)* | -0,310 (<0,001)*** | Alarmas | -0,266 (0,010)** | -0,153 (0,020)* | -0,230 (0,004)** |
| Luz | -0,195 (0,027)* | -0,089 (0,313) | -0,119 (0,179) | Pulsioxímetros | -0,041 (0,648) | -0,153 (0,084) | -0,230 (0,009)** |
| Cuidados enfermería | -0,159 (0,071) | -0,315 (<0,001)*** | -0,299 (0,001)*** | Escuchar gente hablando | -0,185 (0,036)* | -0,043 (0,627) | -0,186 (0,034)* |
| Test diagnósticos | -0,018 (0,837) | -0,304 (<0,001)*** | -0,236 (0,007)** | Aspirar secreciones | -0,006 (0,947) | -0,039 (0,662) | -0,152 (0,086) |
| Actividades de enfermería | -0,017 (0,846) | -0,328 (<0,001)*** | -0,216 (0,014)* | Nebulizaciones | -0,026 (0,770) | -0,217 (0,014)* | -0,060 (0,497) |
| Extracción de muestras | -0,025 (0,777) | -0,198 (0,025)* | -0,188 (0,033)* | Teléfono | -0,064 (0,471) | -0,092 (0,301) | -0,026 (0,767) |
| Administración de medicamentos | -0,009 (0,921) | -0,192 (0,029)* | -0,239 (0,006)** | Total ruido | 0,248 (0,005)** | 0,185 (0,036)* | 0,230 (0,009)** |
| Total F. ambientales | -0,162 (0,067) | -0,250 (0,004)** | -0,208 (0,018)* |

**Rho de Spearman (*r*).** P valor ≤ 0,05*, P valor ≤ 0,005**, P valor ≤ 0,001***.
